# Supplementary material
Source: PubMed Central journal article supplement (PMC9990445)
Supplement: NIHMS1872924-supplement-Supplement.pdf [file NIHMS1872924-supplement-Supplement.pdf]

**A**  
Phenotypes associated with targeted expression of H3.3K27M, H3.3K36M and H3.3 WT.

| Promoter     | Lineage                                | Phenotype                                                    |                                                              |                                               |
|--------------|----------------------------------------|--------------------------------------------------------------|--------------------------------------------------------------|-----------------------------------------------|
|              |                                        | K27M                                                         | K36M                                                         | WT                                            |
| <i>Act5C</i> | ubiquitous                             | larval-pupal lethal                                          | larval lethal                                                | no phenotype                                  |
| <i>ey</i>    | eye discs                              | small eyes                                                   | small eyes                                                   | no phenotype                                  |
| <i>robo2</i> | leg discs                              | adult lethal, leg deformity                                  | adult lethal, leg deformity                                  | no phenotype                                  |
| <i>robo1</i> | imaginal discs                         | leg deformity                                                | leg deformity                                                | no phenotype                                  |
| <i>en</i>    | wing discs                             | pupal lethal                                                 | pupal lethal                                                 | no phenotype                                  |
| <i>ptc</i>   | anterior-posterior axis imaginal discs | leg and wing deformity                                       | anterior cross vein missing                                  | no phenotype                                  |
| <i>c179</i>  | muscles and wing discs                 | pupal lethal                                                 | pupal lethal                                                 | no phenotype                                  |
| <i>Mef2</i>  | muscles                                | pupal lethal                                                 | pupal lethal                                                 | no phenotype                                  |
| <i>CG25C</i> | haemocytes                             | increased haemocyte numbers ( $\sim 4 \times 10^7$ cells/ml) | increased haemocyte numbers ( $\sim 4 \times 10^7$ cells/ml) | no phenotype ( $\sim 2 \times 10^7$ cells/ml) |
| <i>elav</i>  | neurons                                | no phenotype                                                 | no phenotype                                                 | no phenotype                                  |
| <i>slit</i>  | MGC and MP1 neurons                    | pupal lethal                                                 | pupal lethal                                                 | no phenotype                                  |
| <i>repo</i>  | glia                                   | pupal lethal                                                 | pupal lethal                                                 | no phenotype                                  |
| <i>gcm</i>   | glia                                   | no phenotype                                                 | no phenotype                                                 | no phenotype                                  |
| <i>crol</i>  | CNS                                    | pupal lethal                                                 | larval-pupal lethal                                          | no phenotype                                  |
| <i>ama</i>   | CNS and imaginal discs                 | leg weakness (80-68% climbing ability)                       | leg weakness (88-85% climbing ability)                       | no phenotype (96-90% climbing ability)        |
| <i>appl</i>  | CNS and imaginal discs                 | larval-pupal lethal                                          | larval-pupal lethal                                          | no phenotype                                  |
| <i>tkk</i>   | CNS, ovary and testis                  | pupal lethal                                                 | pupal lethal                                                 | no phenotype                                  |

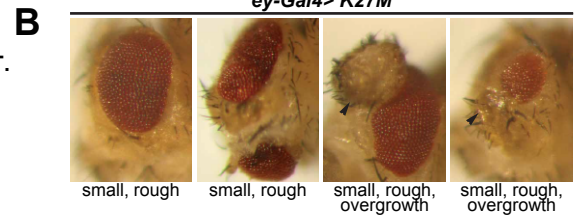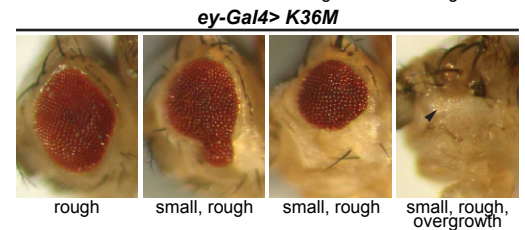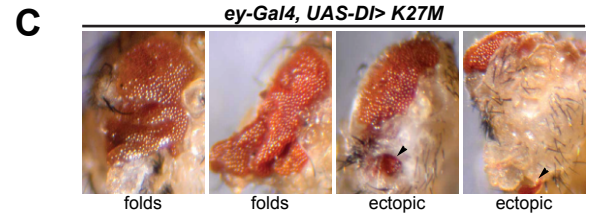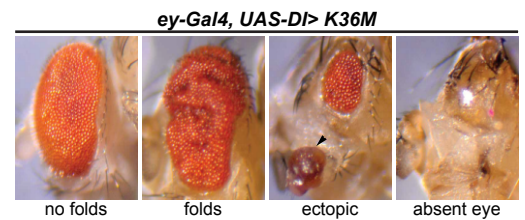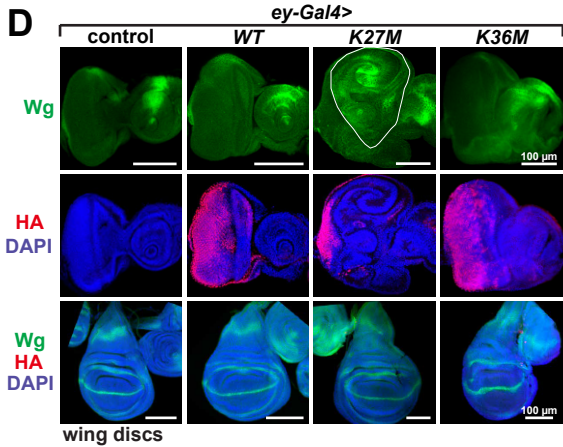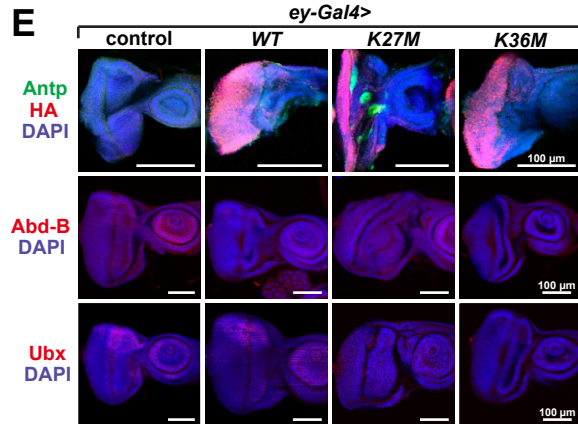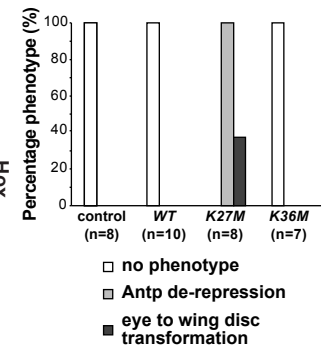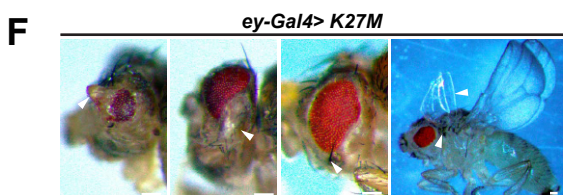

**Figure S1.** Detailed analysis of eye phenotypes in mutant histone H3.3 expressing flies, Related to Figure 1.

**A**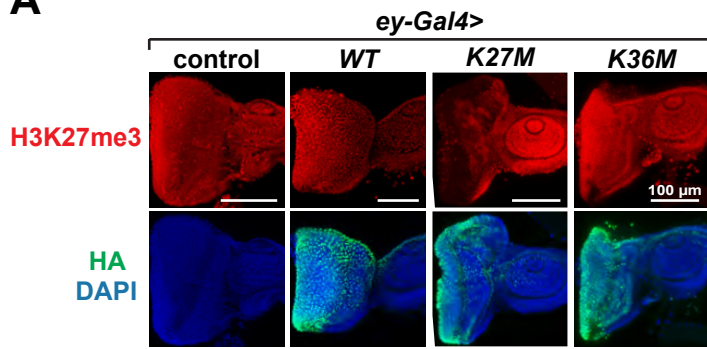**B**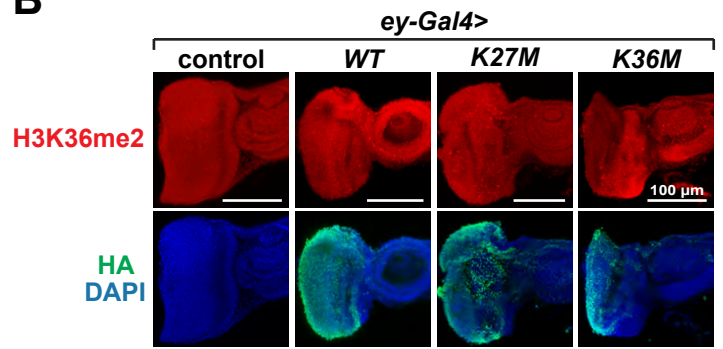

**Figure S2.** Quantification of global changes in histone marks in mutant and wild-type histone H3.3 expressing flies, Related to Figure 2.

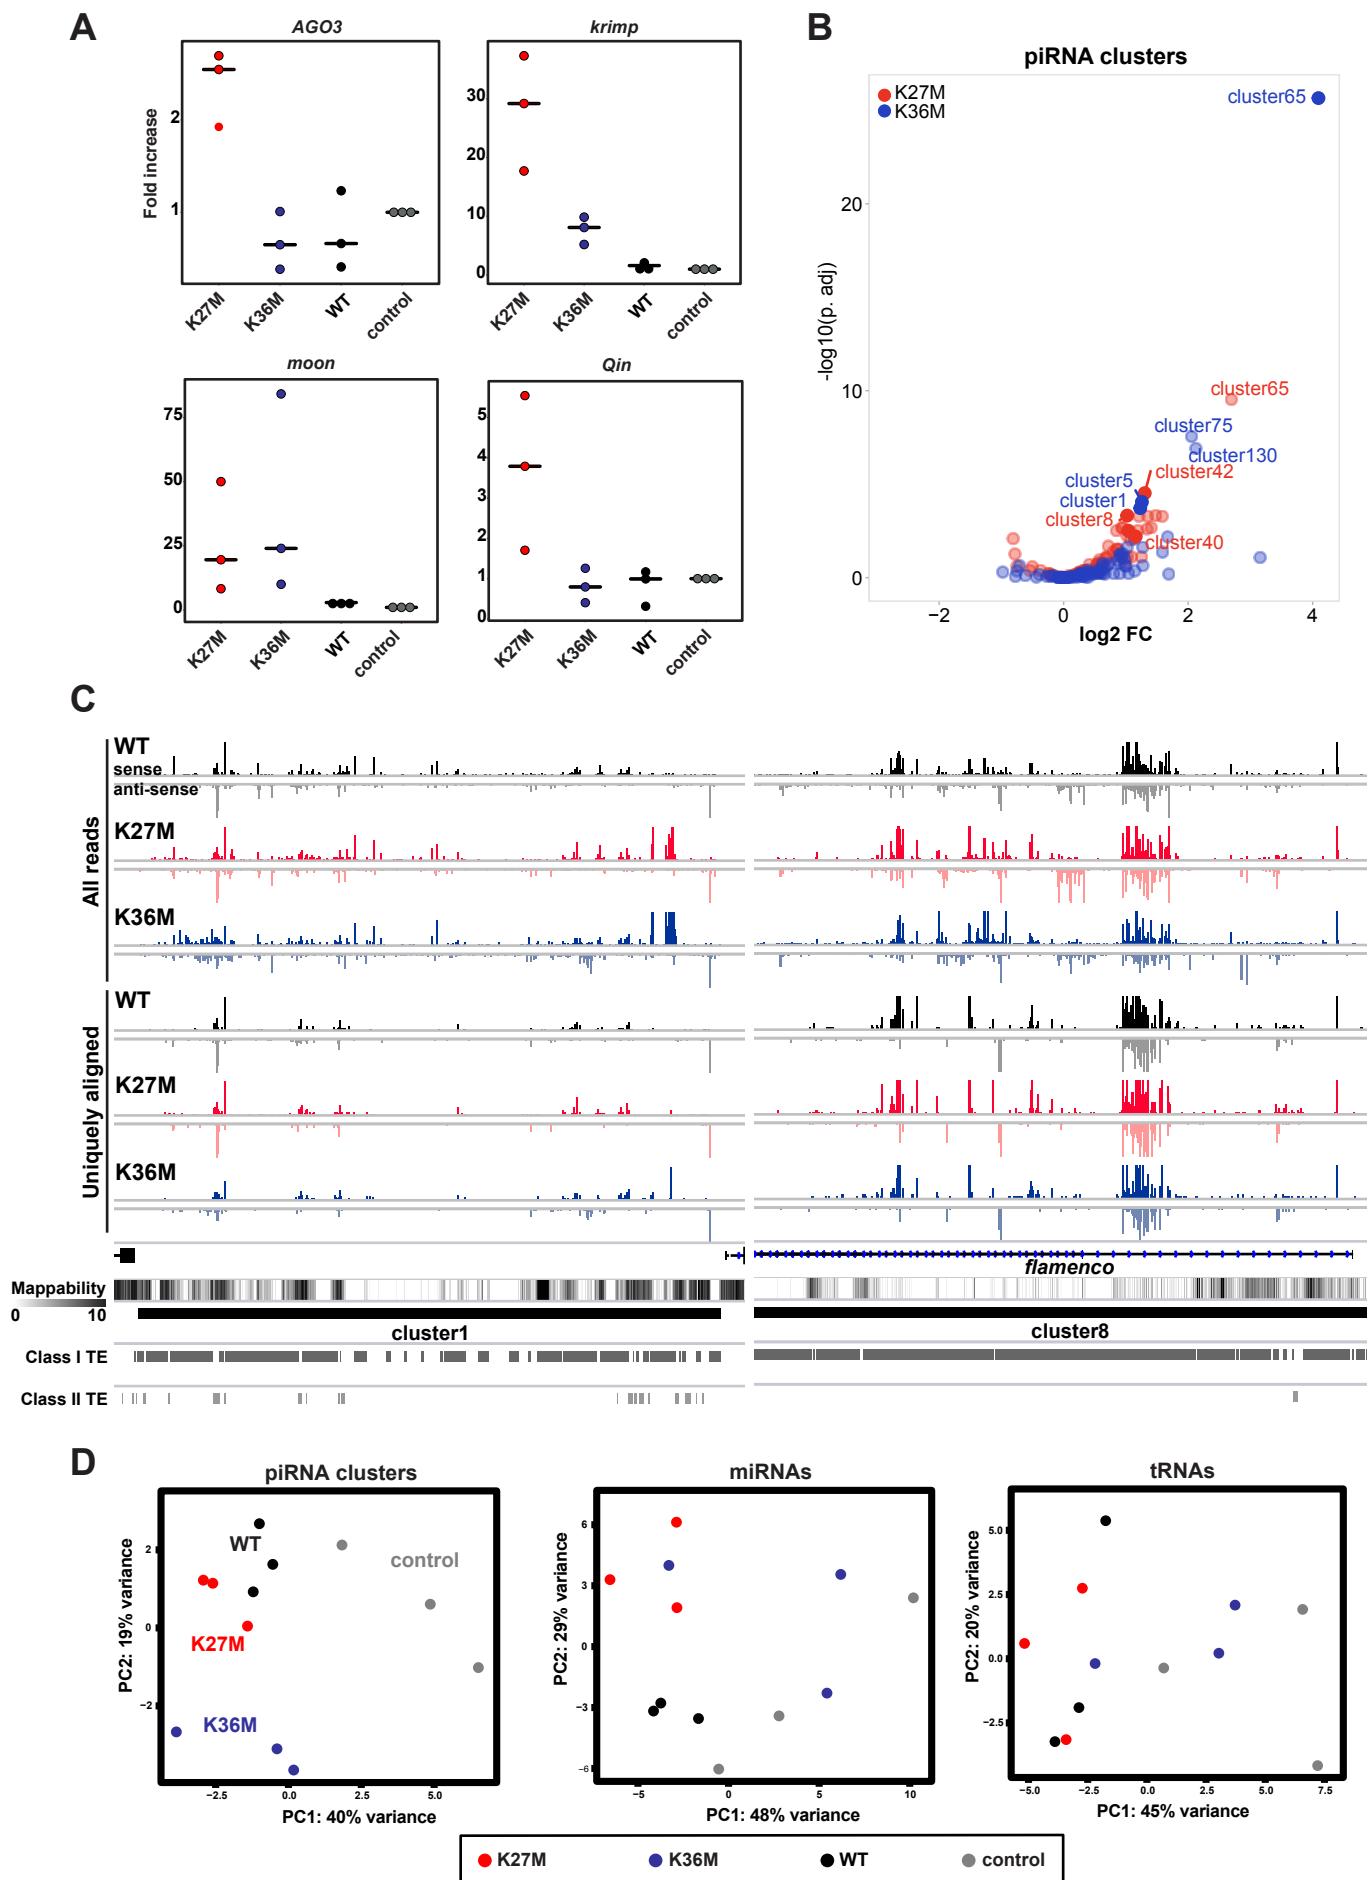

Figure S3. K-to-M mutations result in induction of piRNA genes, Related to Figure 3.

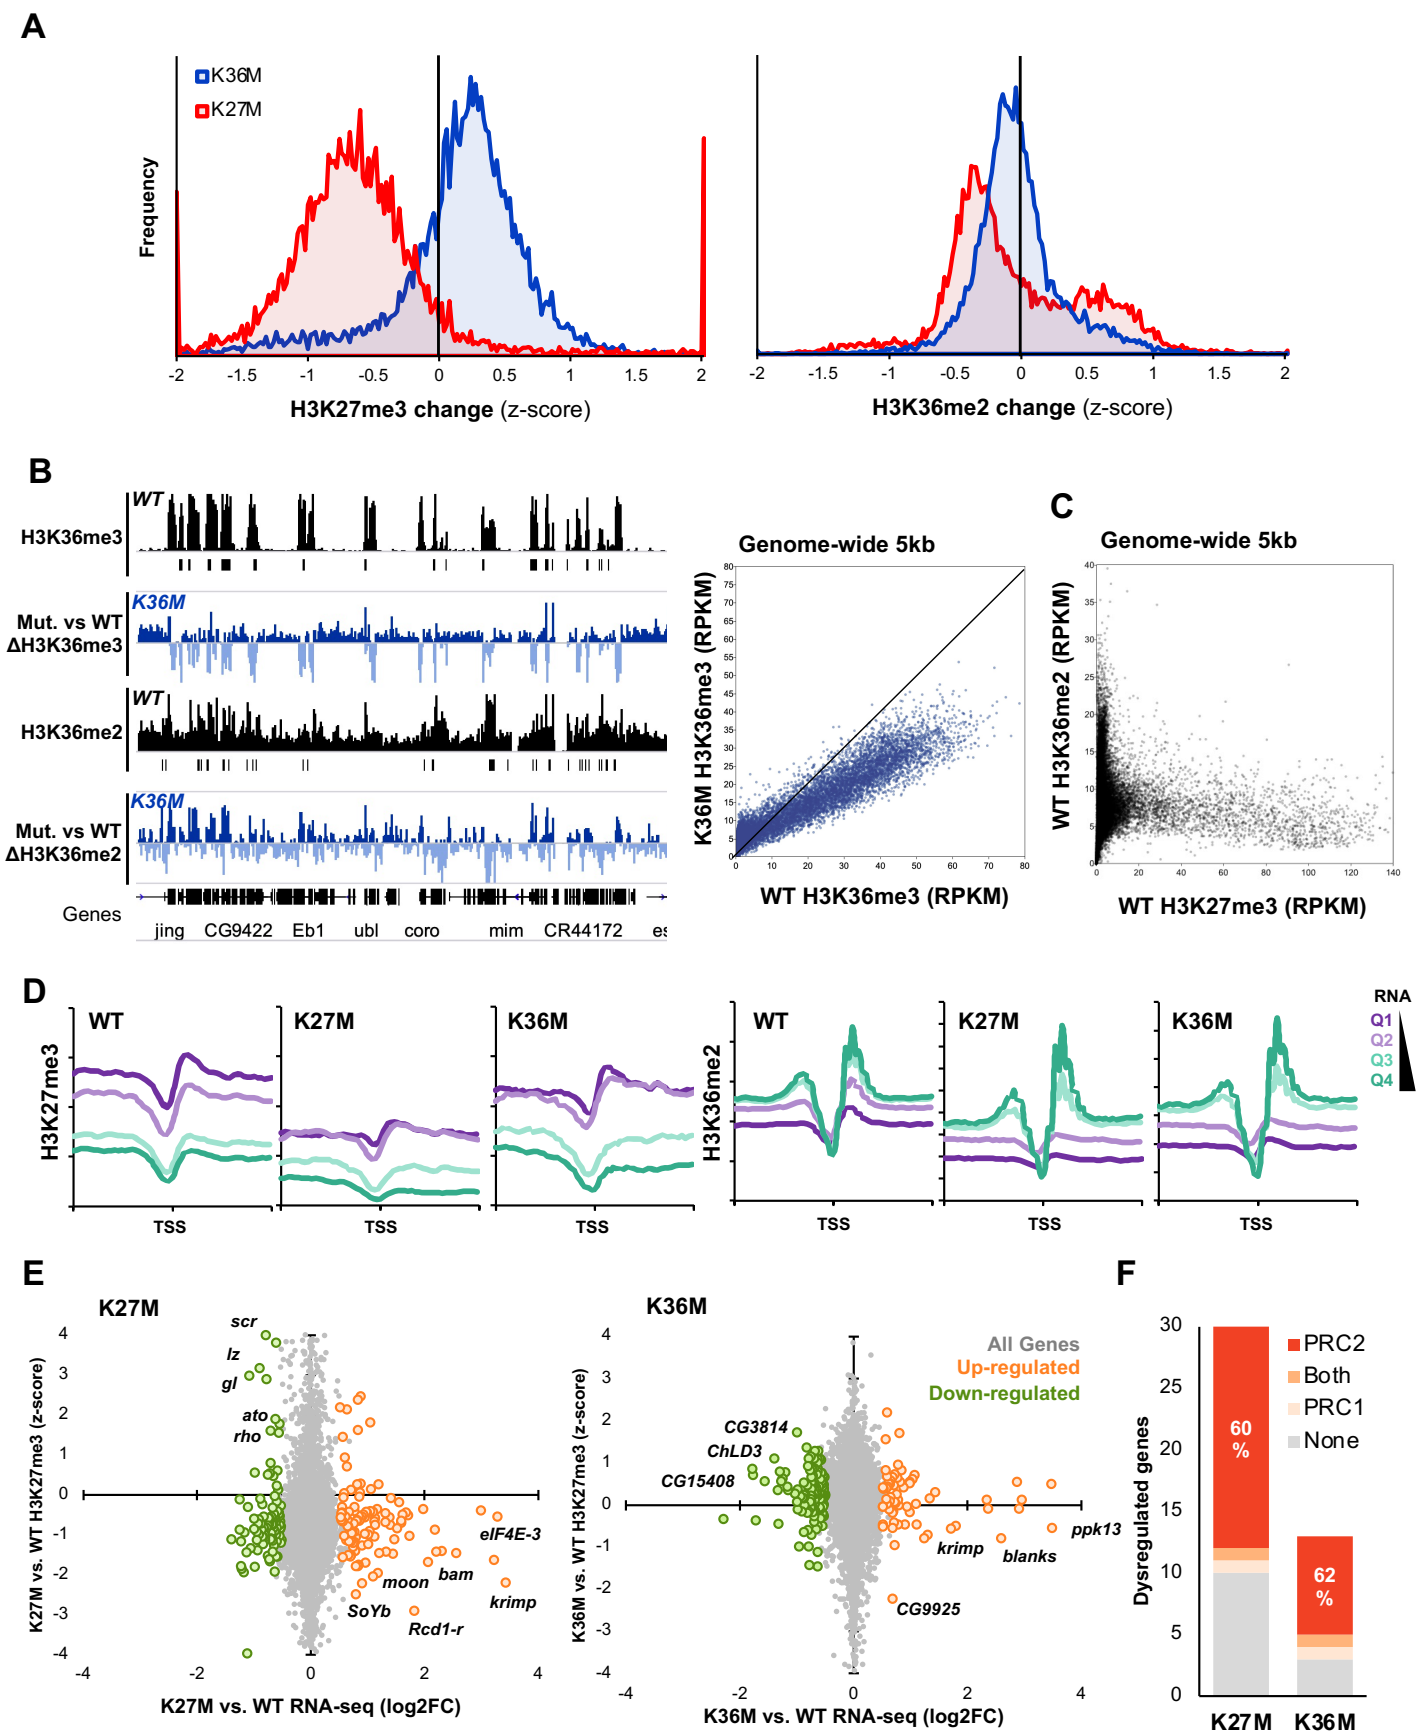

**Figure S4.** H3.3K27M and H3.3K36M perturb global H3K27me3/H3K36me2 landscape, Related to Figure 4.



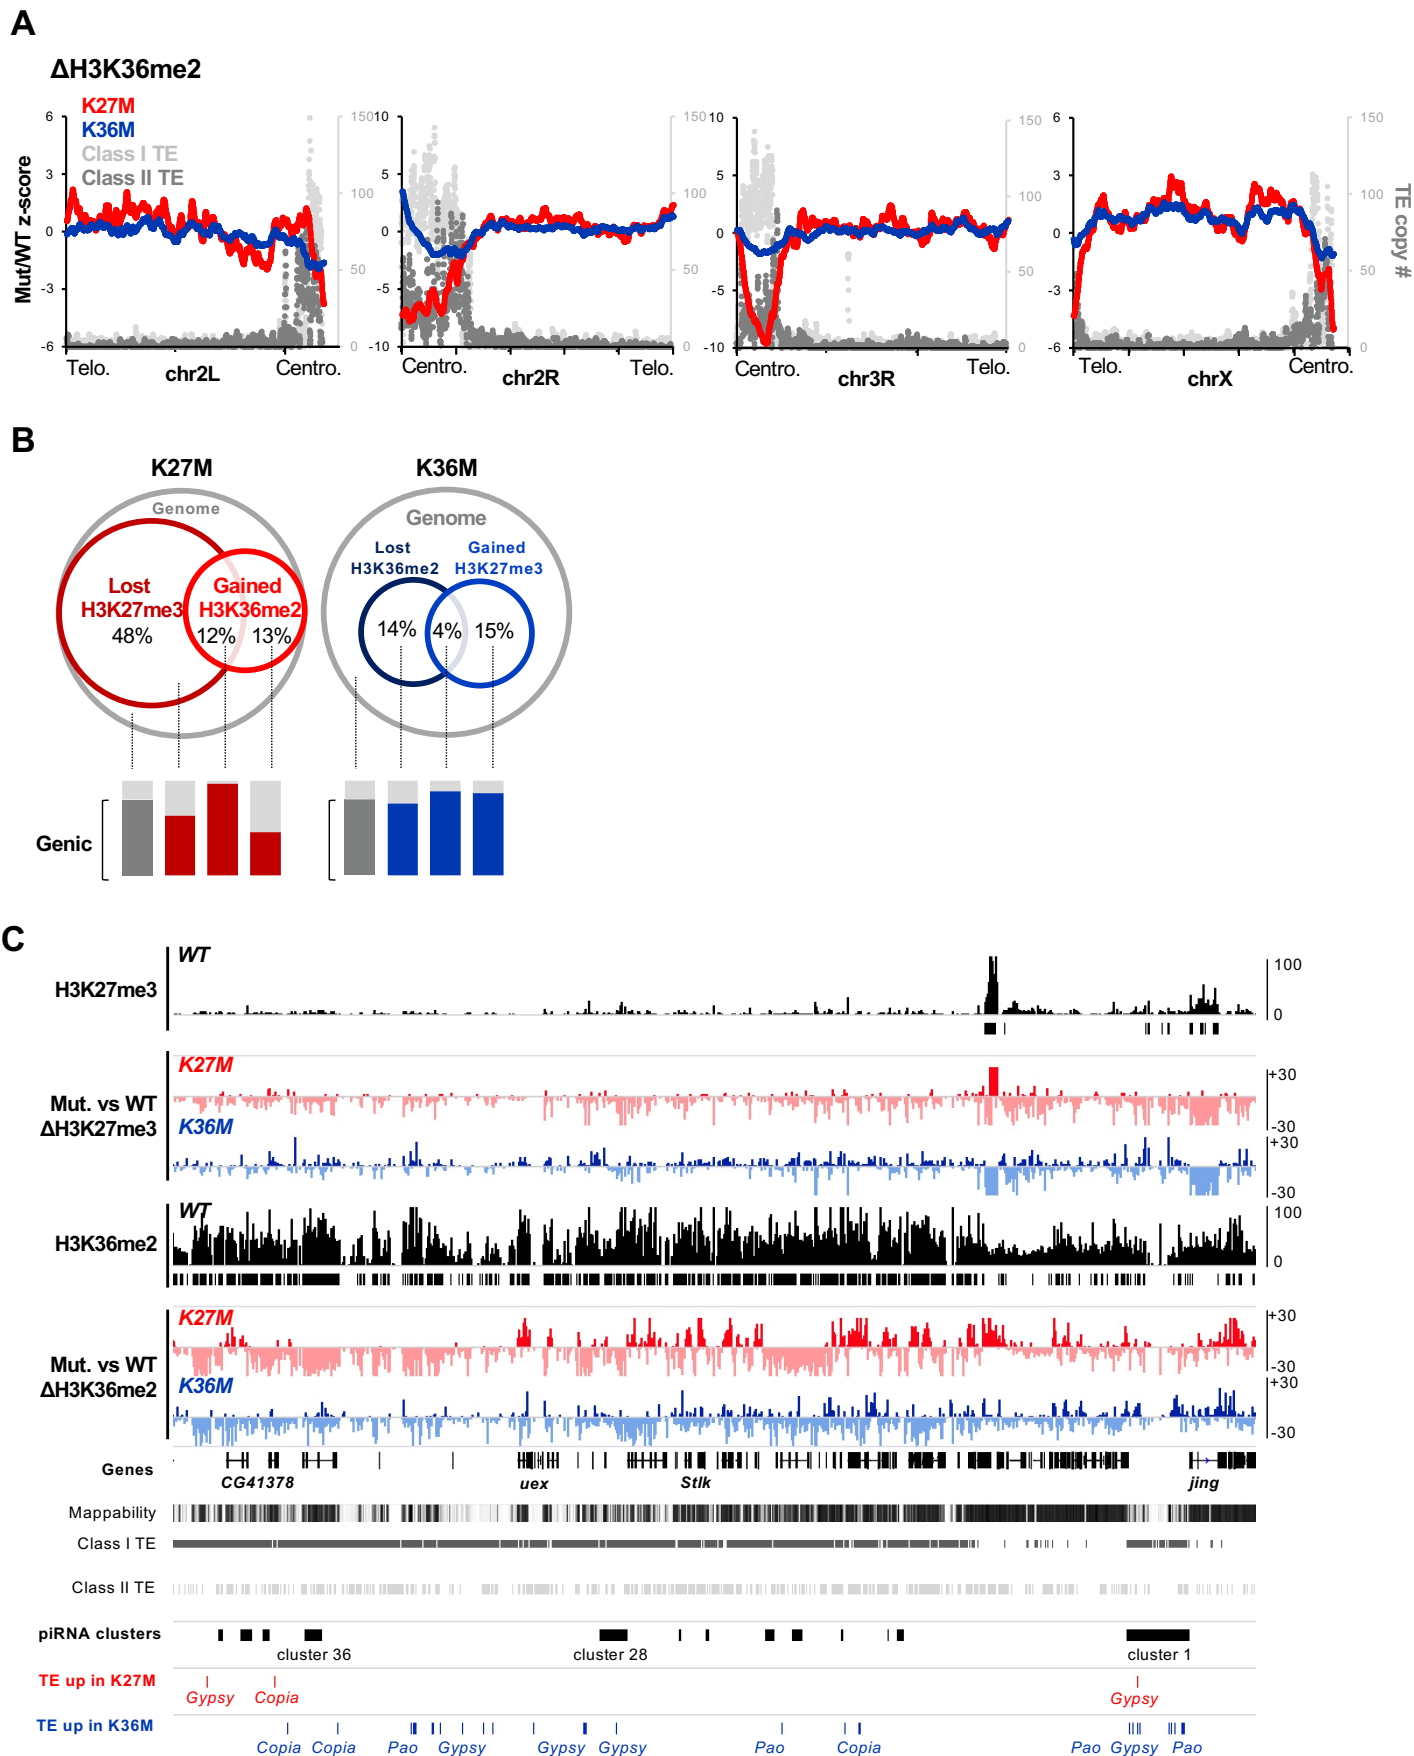

**Figure S5.** H3.3K27M and H3.3K36M redistribute H3K36me2 away from repetitive regions, Related to Figure 4.

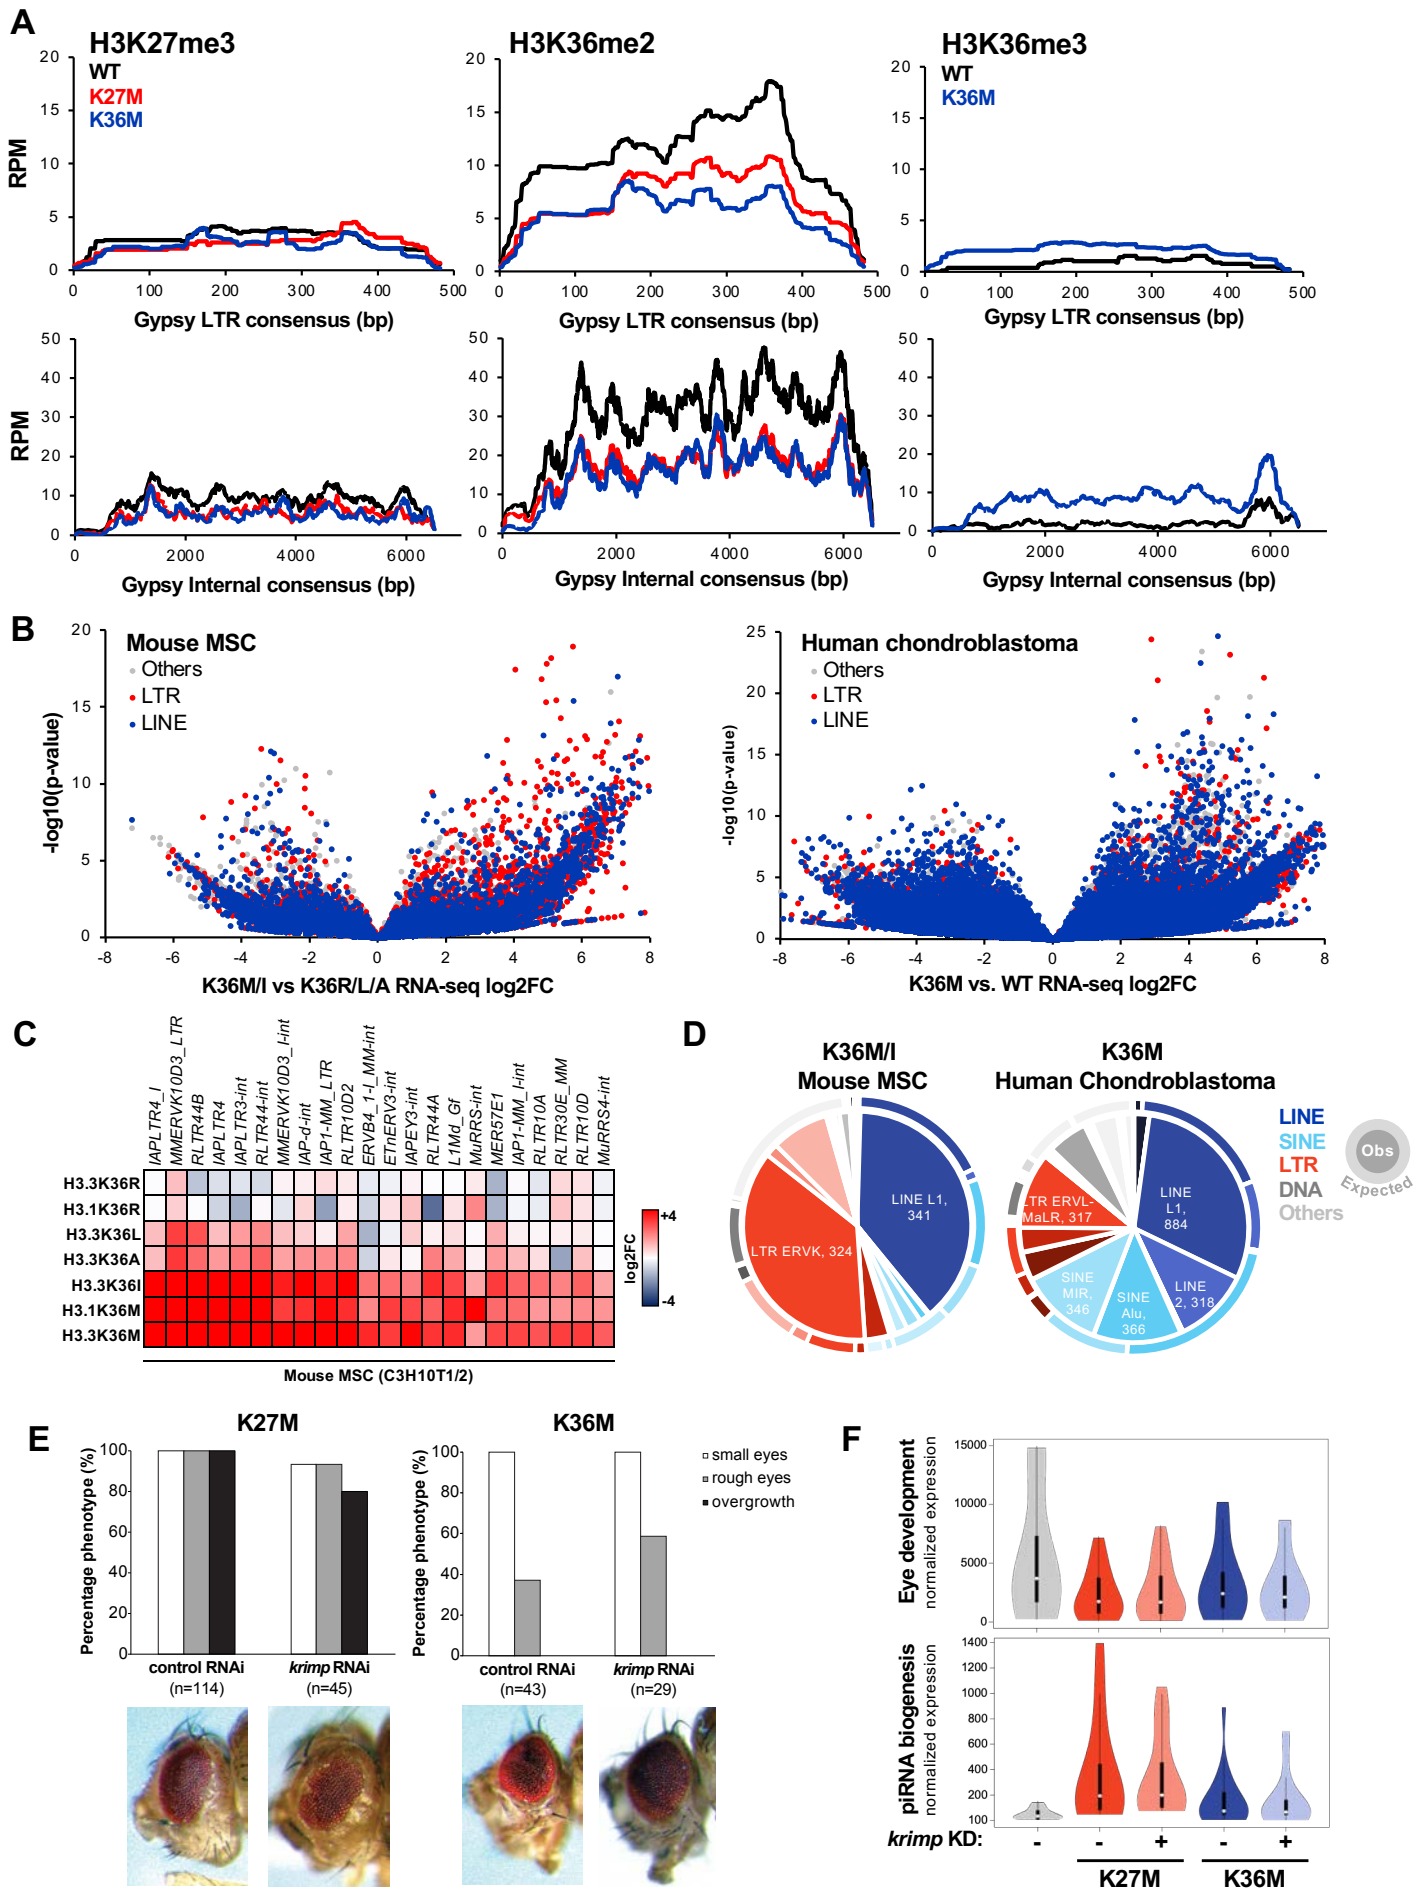

**Figure S6.** H3.3K27M and K36M de-repress transposable elements in flies, Related to Figure 5.

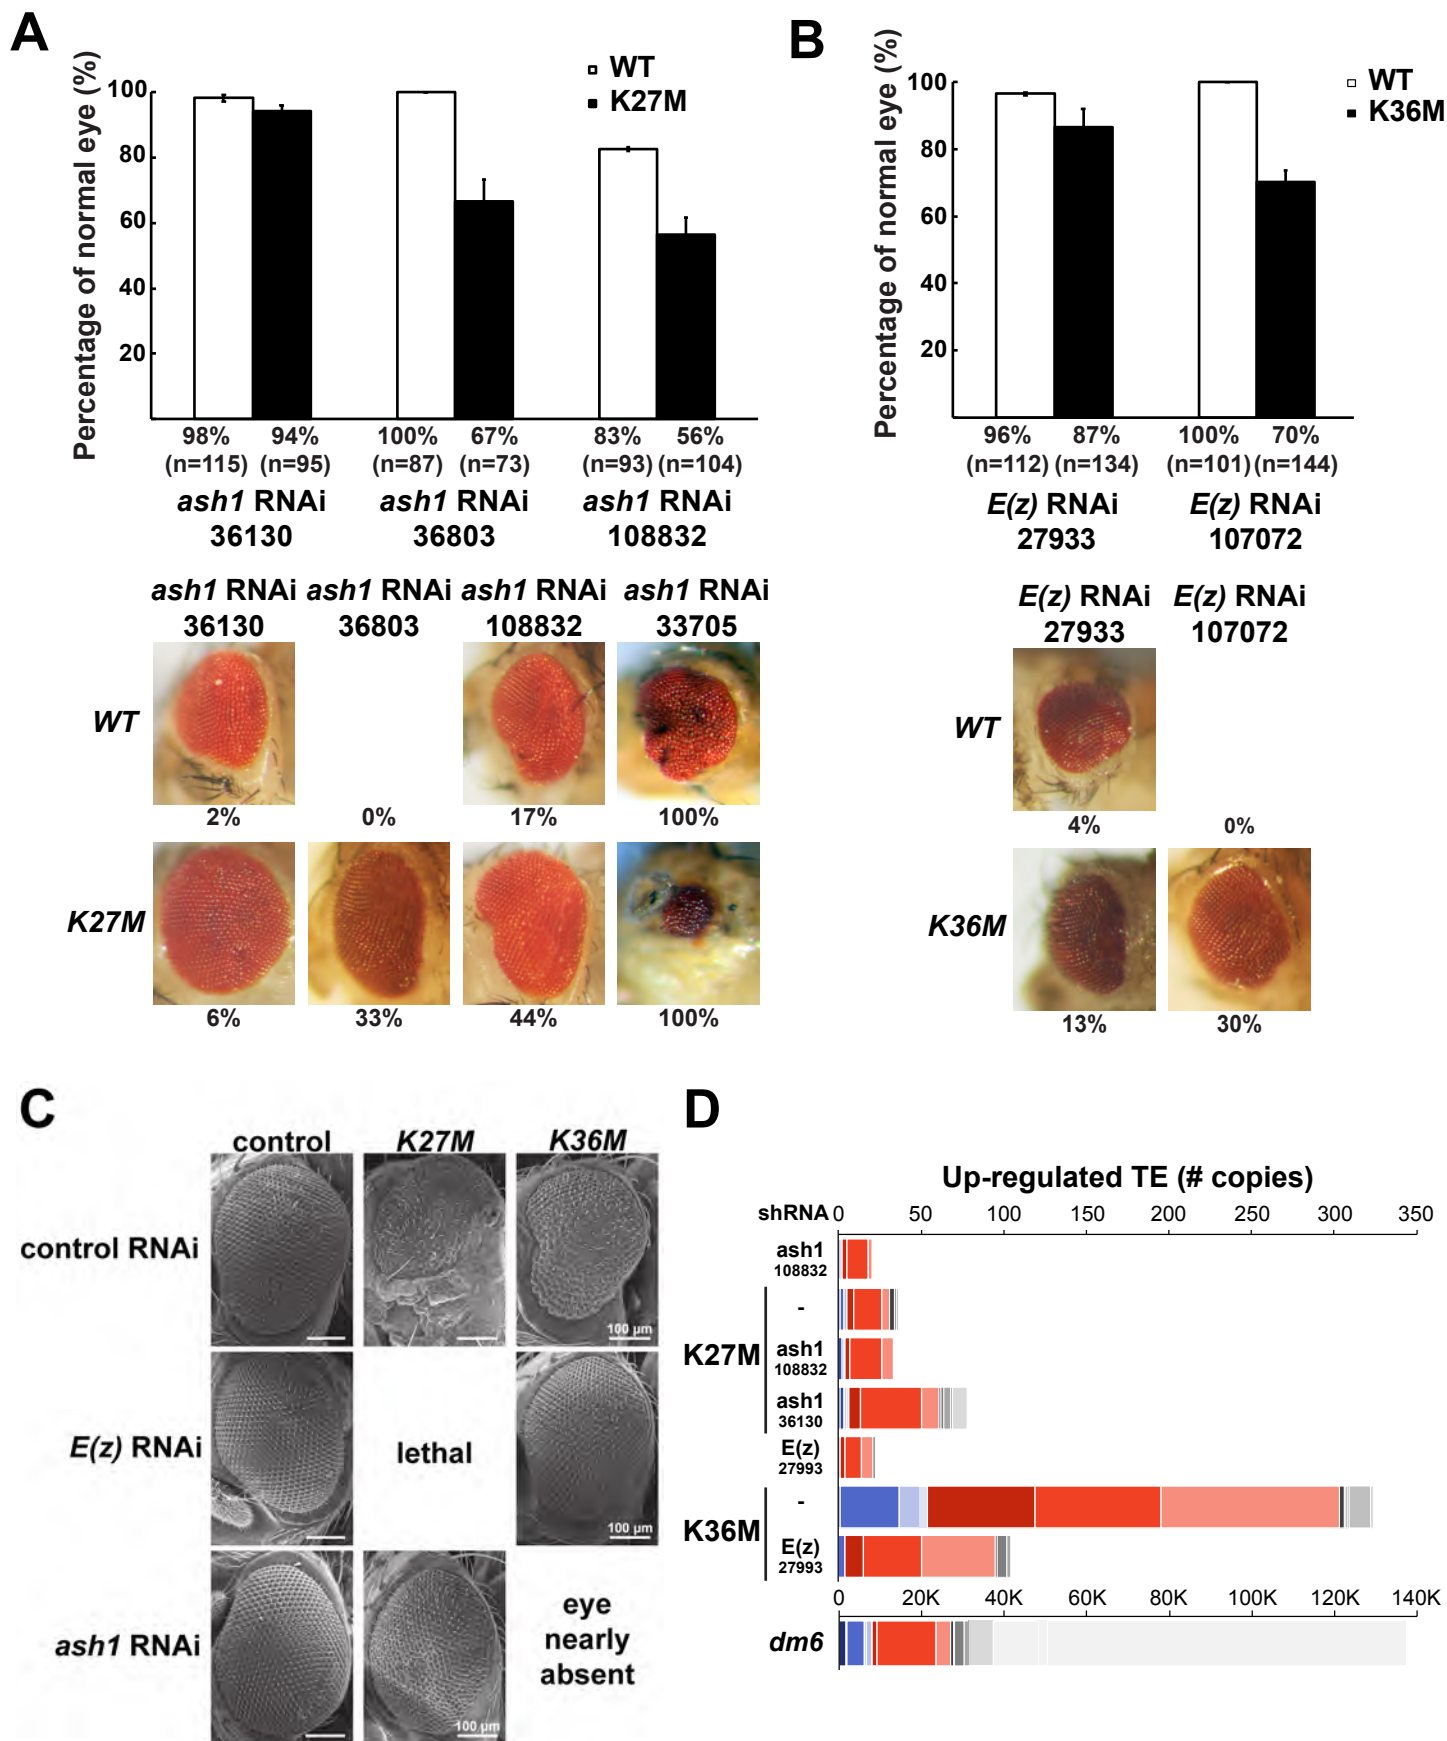

**Figure S7.** shRNA-mediated knockdown of the H3K27 methyltransferase *E(z)* and the H3K36 methyltransferase *ash1* restores normal eye development in mutant H3.3 expressing eye discs, Related to Figure 6.

## **Supplemental Figure Legends**

### **Figure S1. Detailed analysis of eye phenotypes in mutant histone H3.3 expressing flies, Related to Figure 1.**

(A) Phenotypes associated with targeted expression of H3.3K27M, H3.3K36M and H3.3 WT. (B) Expression of H3.3K27M and H3.3K36M in eye imaginal discs resulted in a small/rough eye phenotype with a variation regarding size of compound eyes and tumorous growth of additional head and eye tissue (black arrowheads). The eye phenotype upon H3.3K27M expression was notably more severe as compared to H3.3K36M expression. (C) Range of eye phenotypes upon expression of H3.3K27M or H3.3K36M in a sensitized *ey-Gal4*, *UAS-Dl* background. Expression of H3.3K27M or H3.3K36M resulted in tumorous eyes with variable severity including overgrowth, hyperplastic tissue with folds, metastasis (black arrowheads) or complete loss of eye tissue. (D) Immunofluorescence staining for Wg, a ligand of the Wnt/Wg signaling pathway. In approximately one third of eye discs expressing H3.3K27M, expression of Wg shifts to a wing-like pattern in the dorsal part of the eye disc as marked by the white outline. Scale bar 100 $\mu$ m. (E) Immunofluorescence staining for the Hox proteins Antp, Abd-B, and Ubx in H3.3K36M, H3.3K27M and H3.3 WT overexpressing eye discs. Transgene expression is visualized by HA staining. There is no de-repression of Abd-B or Ubx in histone H3 mutant expressing discs visible. (F) Micrographs of adult eyes illustrating ectopic tissues observed in the eye and head region of H3.3K27M expressing animals (*ey-Gal4*) including leg-like structures, thoracic bristles and an extra pair of wings (white arrows).

### **Figure S2. Quantification of global changes in histone marks in mutant and wild-type histone H3.3 expressing flies, Related to Figure 2.**

(A) Immunofluorescence staining for H3K27me3 or (B) H3K36me2 combined with histone transgene expression (HA staining) in Gal4 control, H3.3 WT, H3.3K27M and H3.3K36M overexpressing eye discs.

**Figure S3. K-to-M mutations result in induction of piRNA genes, Related to Figure 3.**

(A) Dot plots showing qPCR results from three independent experiments validating that *krimp*, *moon*, *AGO3*, and *qin* RNA levels are elevated in H3.3K27M eye discs, and that *krimp* and *moon* RNA levels are elevated in H3.3K36M eye discs. The y-axis shows fold increase relative to *yw* controls. (B) Differential expression analysis of piRNA clusters following small RNAseq between H3.3K27M or H3.3K36M compared to baseline control. (C) Genome browser snapshot depicting piRNA expression at *cluster 1* (left) and *flamenco/cluster 8* (right) in H3.3WT (black), H3.3K27M (red), and H3.3K36M mutants (blue). Upper panel: all aligned reads in the sense (positive, darker) and anti-sense (negative, lighter) orientation. Lower panel: uniquely aligned ( $\text{mapQ} \geq 1$ ) reads. (D) Principal component analysis of the smRNA-seq data, using as features expression of piRNA clusters (left), microRNA genes (middle), or tRNAs (right).

**Figure S4. H3.3K27M and H3.3K36M perturb global H3K27me3/H3K36me2 landscape, Related to Figure 4.**

(A) Histogram of genome-wide H3K27me3 (left) and H3K36me2 (right) changes in H3.3K27M and H3.3K36M mutant flies. Positive z-score indicate gain of the mark in mutant vs. H3.3 WT flies. (B) Left: browser snapshot of H3K36me3 and H3K36me2 loss in H3.3K36M eye disc compared to H3.3WT. Right: genome-wide 5kb quantification of H3K36me3 in H3.3 WT vs. H3.3K36M. (C) Scatterplot depicting genome-wide anti-correlation between H3K27me3 and H3K36me2 in H3.3 WT eye disc. (D) Metagene plot depicting H3K27me3 and H3K36me2 level in relation to transcriptional activity in H3.3 WT, H3.3K27M, and H3.3K36M. Genes were stratified into 4 quartiles based on expression in H3.3 WT (Q1 being silenced and Q4 being highly transcribed), and H3K27me3/H3K36me2 enrichment (RPKM) were plotted in 5 kilobase window centered on the transcription start site. (E) Scatterplot depicting the relationship of gene expression change vs. H3K27me3 at all annotated promoters. (F) Overlap of differentially expressed genes



with genes deregulated upon loss-of-function of PRC1 or PRC2 in the *Drosophila* eye (Loubiere et al., 2016).

**Figure S5. H3.3K27M and H3.3K36M redistribute H3K36me2 away from repetitive regions, Related to Figure 4.**

(A) Smoothed line plot depicting H3.3K27M- or H3.3K36M-mediated H3K36me2 change in relation to transposable element (TE) copy numbers on autosomes and chromosome X. (B) Venn diagram of genomic bins showing concurrent H3K27me3-loss/H3K36me2-gain in H3.3K27M (left), and reciprocally H3K36me2-loss/H3K27me3-gain in H3.3K36M (right). Below, the percentage of bins falling into genic vs. intergenic region in each category. Note enrichment of genic bins in the intersection of H3K27me3/H3K36me2 change in both mutants. (C) Genome browser snapshot of pericentromeric region of chr2R, showing localization of up-regulated TE observed in H3.3K27M and H3.3K36M flies. Black boxes: WT H3K27me3 and WT H3K36me2 called peaks.

**Figure S6. H3.3K27M and K36M de-repress transposable elements in flies, Related to Figure 5.**

(A) Alignment of H3K27me3 and H3K36me2/3 at Gypsy LTR (upper panels) and internal (lower panels) consensus sequence in H3.3 WT (black), K27M (red), and K36M (blue). (B) Volcano plot depicting K36M-mediated transcriptional dysregulation in repetitive sequences in murine mesenchymal stem cells, or MSCs (left), and human primary chondroblastoma (right). Each dot represents an individual copy of repeat, and red dots represent individual LTR elements while blue dots depict LINEs. (C) Heatmap depicting TE de-repression in panel of K36 mutants relative to H3.3WT-expressing MSCs. (D) Pie chart depicting number and diversity of repeat copies showing significant up-regulation ( $\log_2FC > 2$ ,  $FDR < 0.05$ ) in murine MSCs and human chondroblastoma. Outer ring: copy number of each repeat class in the respective mouse (mm10) and human (hg19) genomes. (E) The *krimp* shRNA strain BDSC#35230 was tested regarding its potential to rescue the eye phenotype compared to H3.3K27M or H3.3K36M expression combined with control RNAi (mCherry BDSC#35785) knockdown. Micrographs (lower panel) show representative images of H3.3K27M/*krimp* RNAi (small, rough with overgrowth) and H3.3K36M/*krimp* RNAi (small, not

rough) expressing flies compared to control flies. Eye phenotypes of H3.3K27M and H3.3K36M expressing flies are scored according to the following criteria: small eyes, rough eyes and overgrowth. Note that there was no major rescue detected upon *krimp* knockdown. **(F)** Violin plot representing normalized expression score for eye developmental genes and germ cell/piRNA genes in *krimp*-KD H3.3K27M and H3.3K36M flies, relative to mCherry KD controls.

**Figure S7. shRNA-mediated knockdown of the H3K27 methyltransferase *E(z)* and the H3K36 methyltransferase *ash1* restores normal eye development, Related to Figure 6.**

**(A)** Three independent *ash1* shRNA strains were tested regarding their potential to rescue the eye phenotype observed upon *ey>H3.3K27M* expression (BDSC ID 36130: 94.39% rescue, sem: 1.56, n=95; VDRC ID 108832: 56.54% rescue, sem: 5.30, n=104; BDSC ID 36803: 66.70% rescue, sem: 6.67, n=73). Micrographs (right panel) show H3.3K27M/*ash1* RNAi expressing flies which were not completely rescued, as well as H3.3 WT/*ash1* RNAi expressing flies exhibiting an eye phenotype (BDSC ID 36130: 1.79% eye phenotype, sem: 1.03, n=115; VDRC ID 108832: 17.44% eye phenotype, sem: 0.59, n=93; BDSC ID 36803: 0% eye phenotype, n=87). **(B)** Two independent *E(z)* shRNA strains were tested regarding their potential to rescue the eye phenotype observed upon eyeless-specific H3.3K36M expression (BDSC ID 27993: 86.62% rescue, sem: 5.47, n=134; VDRC ID 107072: 70.29% rescue, sem:3.29, n=144). Micrographs (right panel) show H3.3K36M/*E(z)* RNAi expressing flies which were not completely rescued, as well as H3.3 WT/*E(z)* RNAi expressing flies exhibiting an eye phenotype (BDSC ID 27993: 3.48% eye phenotype, sem: 0.54, n=112; VDRC ID 107072: 0% eye phenotype, n=101). **(C)** SEM micrographs of adult eyes illustrating modifier effects of *E(z)* and *ash1* knockdown on *eyeless>H3.3K27M* and *ey>H3.3K36M* flies. Expression of either *E(z)* or *ash1* shRNA alone has no significant phenotype. **(D)** Number of transposon elements significantly up-regulated ( $\log_2FC > 0$ , FDR < 0.05) in *ash1*-rescued K27M and *E(z)*-rescued K36M, compared to *ash1*-KD alone, *E(z)*-KD alone, and mCherry RNAi negative control. Below, copy number of each repeat class in *dm6*.

**Table S3: Differential expression analysis of piRNA biogenesis genes in eye imaginal discs expressing H3.3K27M compared to yw controls, Related to Figure 3.**

|                         |                                                      | Ensembl_ID  | Symbol_ID      | log2FoldChange  | P-value adjusted |
|-------------------------|------------------------------------------------------|-------------|----------------|-----------------|------------------|
| <b>piRNA biogenesis</b> | <b>PIWI proteins</b>                                 | FBgn0000146 | aub            | <b>0.2446</b>   | 0.599771         |
|                         |                                                      | FBgn0250816 | AGO3           | <b>1.1092</b>   | <b>5.06E-08</b>  |
|                         |                                                      | FBgn0004872 | piwi           | <b>0.7686</b>   | <b>0.001316</b>  |
|                         | <b>TDRD proteins</b>                                 | FBgn0003891 | tud            | <b>0.0000</b>   | 0.999787         |
|                         |                                                      | FBgn0031401 | papi           | <b>0.2042</b>   | <b>0.015961</b>  |
|                         |                                                      | FBgn0263974 | qin            | <b>1.7866</b>   | <b>1.91E-22</b>  |
|                         |                                                      | FBgn0033921 | tej            | <b>0.1767</b>   | 0.727586         |
|                         |                                                      | FBgn0003483 | spn-E          | <b>-0.3718</b>  | 0.056024         |
|                         |                                                      | FBgn0000928 | fs(1)Yb        | <b>1.0245</b>   | <b>2.26E-06</b>  |
|                         |                                                      | FBgn0037205 | BoYb           | <b>1.6285</b>   | <b>5.97E-13</b>  |
|                         |                                                      | FBgn0051755 | SoYb           | <b>2.8846</b>   | <b>4.8E-166</b>  |
|                         |                                                      | FBgn0263143 | vret           | <b>0.2275</b>   | 0.20485          |
|                         |                                                      | FBgn0034098 | krimp          | <b>3.8891</b>   | <b>6.2E-224</b>  |
|                         |                                                      | FBgn0086908 | egg            | <b>0.0228</b>   | 0.901081         |
|                         | <b>Other nuage proteins</b>                          | FBgn0041164 | armi           | <b>0.0760</b>   | 0.471933         |
|                         |                                                      | FBgn0262526 | vas            | <b>0.6323</b>   | <b>0.007611</b>  |
|                         |                                                      | FBgn0016034 | mael           | <b>1.3151</b>   | <b>7.06E-12</b>  |
|                         |                                                      | FBgn0261266 | zuc            | <b>0.3371</b>   | 0.193764         |
|                         |                                                      | FBgn0267347 | squ            | <b>0.2220</b>   | <b>0.009817</b>  |
|                         |                                                      | FBgn0003401 | shu            | <b>0.3056</b>   | 0.096796         |
|                         | <b>Heterochromatin piRNA transcription</b>           | FBgn0030373 | CG12721/moon   | <b>1.9618</b>   | <b>8.04E-18</b>  |
|                         |                                                      | FBgn0086251 | del            | <b>1.5923</b>   | <b>3.46E-77</b>  |
|                         | <b>nuclear proteins involved in piRNA biogenesis</b> | FBgn0014189 | Hel25E/uap56   | <b>0.1017</b>   | <b>0.054590</b>  |
| FBgn0004400             |                                                      | rhi         | <b>0.1037</b>  | 0.871447        |                  |
| <b>pole plasm</b>       | FBgn0003165                                          | pum         | <b>-0.1904</b> | 0.307085        |                  |
|                         | FBgn0003520                                          | stau        | <b>-0.1109</b> | 0.397707        |                  |
|                         | FBgn0016053                                          | pgc         | <b>0.1206</b>  | NA              |                  |
|                         | FBgn0003015                                          | osk         | <b>-0.4840</b> | NA              |                  |
|                         | FBgn0002962                                          | nos         | <b>0.9065</b>  | <b>0.000523</b> |                  |

**Table S6: RNAi strains for genetic modifier screen including PRC1, PRC2 members, lysine methyltransferases and candidates from the piwi-interacting RNA (piRNA) pathway, Related to Figure 5-6.**

| no. | CG no.  | Fruit Fly gene name | Human ortholog | VDRC ID | BDSC/DGRC ID | UAS # | Vector    |
|-----|---------|---------------------|----------------|---------|--------------|-------|-----------|
| 1   | CG6502  | E(z)                | EZH2           |         | 27993        | 10    | VALIUM 10 |
| 2   | CG6502  | E(z)                | EZH2           | 107072  |              | 10    | KK        |
| 3   | CG14941 | Esc                 | EED            | 5690    |              | 10    | GD        |
| 4   | CG5202  | Escl                | EED            | 49982   |              | 10    | GD        |
| 5   | CG8013  | Su(z)12             | SUZ12          |         | 33402        | 10    | VALIUM 20 |
| 6   | CG4236  | Caf1-55             | RBBP4          | 26455   |              | 10    | GD        |
| 7   | CG9397  | Jing                | AEBP2          |         | 55633        | 10    | VALIUM 20 |
| 8   | CG8887  | ash1                | ASH1L          |         | 36130        | 10    | VALIUM 10 |
| 9   | CG8887  | ash1                | ASH1L          |         | 36803        | 10    | VALIUM 22 |
| 10  | CG8887  | ash1                | ASH1L          | 108832  |              | 10    | KK        |
| 11  | CG1716  | Set2                | SETD2          |         | 55221        | 10    | VALIUM 22 |
| 12  | CG5595  | Sce                 | RING1,<br>RNF2 | 106328  |              | 10    | KK        |
| 13  | CG3886  | Psc                 | BMI1           | 30587   |              | 10    | GD        |
| 14  | CG3905  | Su(z)2              | BMI1           | 50368   |              | 10    | GD        |
| 15  | CG32443 | Pc                  | CBX6,<br>CBX8  |         | 33622        | 10    | VALIUM 20 |
| 16  | CG9495  | Scm                 | SCMH1          | 109597  |              | 10    | KK        |
| 17  | CG18412 | ph-p                | PHC3           | 100811  |              | 10    | KK        |
| 18  | CG3895  | ph-d                | PHC2           |         | 63018        | 10    | VALIUM 20 |
| 20  | CG5640  | Utx                 | KDM6A/B        |         | 34076        | 10    | VALIUM 20 |
| 21  | CG11033 | kdm2                | KDM2A/B        |         | 31360        | 10    | VALIUM 1  |
| 22  | CG4976  | NSD                 | NSD1/2/3       |         | 34033        | 10    | VALIUM 20 |
| 23  | CG15707 | Krimp               | TDRD1          |         | 35230        | 10    | VALIUM 22 |

Table S7: Patched-specific modifier screen, Related to Figure 6.

| <i>RNAi tested</i> | <i>wing defects in K27M expressing flies</i> | <i>leg defects in K27M expressing flies</i> | <i>Rescue of K36M wing phenotype (ACV loss)</i> |
|--------------------|----------------------------------------------|---------------------------------------------|-------------------------------------------------|
| mCherry control    | 80% ± 7                                      | 98% ± 4                                     |                                                 |
| E(z)               | 100%                                         | 100%                                        |                                                 |
| Esc                | 100%                                         | 100%                                        |                                                 |
| Escl               | 93%                                          | 100%                                        |                                                 |
| Su(z)12            | 100%                                         | 100%                                        |                                                 |
| Caf1-55            | 77%                                          | 100%                                        |                                                 |
| Jing               | <b>lethal</b>                                | <b>lethal</b>                               |                                                 |
| Psc                | 95%                                          | 100%                                        |                                                 |
| Su(z)2             | 92%                                          | 100%                                        |                                                 |
| Sce                | 100%                                         | 100%                                        |                                                 |
| Pc                 | 100%                                         | 100%                                        |                                                 |
| Ph-p               | 100%                                         | 100%                                        |                                                 |
| Ph-d               | 54% ± 4                                      | 67% ± 16                                    | n.d.                                            |
| Scm                | <b>lethal</b>                                | <b>lethal</b>                               |                                                 |
| ash1               | 31.0% ± 11                                   | 58.5% ± 8                                   |                                                 |
| Nsd                | 77% ± 8                                      | 100%                                        |                                                 |
| Set2               | 91%                                          | 100%                                        |                                                 |
| kdm2               | 85.0% ± 2                                    | 95% ± 1                                     |                                                 |
| Utx                | 92%                                          | 100%                                        |                                                 |



**Table S8: Modifier screen including PRC1, PRC2 members and lysine methyltransferases, Related to Figure 6.**

| RNAi tested     | <i>slit</i> -GAL4><br>K36M   | <i>Act5C</i> -GAL4><br>K36M       | <i>ey</i> -Gal4> K27M | <i>ey</i> -GAL4><br>K36M |
|-----------------|------------------------------|-----------------------------------|-----------------------|--------------------------|
| mCherry control | pupal lethality              | pupal lethality, pupation defects | rough, small eyes     | rough, small eyes        |
| E(z) 27993      | viability:<br>89.0%<br>± 6.4 | no pupation defects               | lethal                | positive shift           |
| Esc             | no shift                     | larval lethal                     | no shift              | no shift                 |
| EscI            | no shift                     | larval lethal                     | no shift              | no shift                 |
| Su(z)12         | no shift                     | no shift                          | lethal                | negative shift*          |
| Caf1-55         | no shift                     | larval lethal                     | lethal                | lethal                   |
| Jing            | larval lethal                | larval lethal                     | lethal                | lethal                   |
| Psc             | no shift                     | larval lethal                     | no shift              | no shift                 |
| Su(z)2          | no shift                     | larval lethal                     | 78% lethal            | 94% lethal               |
| Sce             | no shift                     | larval lethal                     | lethal                | lethal                   |
| Pc              | no shift                     | larval lethal                     | 91% lethal            | 93% lethal               |
| Ph-p            | no shift                     | no shift                          | no shift              | no shift                 |
| Ph-d            | no shift                     | no shift                          | no shift              | no shift                 |
| Scm             | no shift                     | no shift                          | lethal                | lethal                   |
| ash1 108832     | no shift                     | no shift                          | positive shift        | 99% lethal               |
| NSD             | no shift                     | no shift                          | no shift              | no shift                 |
| Set2            | no shift                     | no shift                          | no shift              | no shift                 |
| kdm2            | no shift                     | no shift                          | no shift              | no shift                 |
| UTX             | no shift                     | no shift                          | no shift              | no shift                 |

\* Sex specific differences: Su(z)12 negative shift only in females

Table S9: Additional *ash1* and *E(z)* RNAs tested, Related to Figure 6.

| RNAi tested     | <i>slit</i> -GAL4> K36M | <i>Act5C</i> -GAL4> K36M          | <i>ey</i> -Gal4> K27M | <i>ey</i> -GAL4> K36M |
|-----------------|-------------------------|-----------------------------------|-----------------------|-----------------------|
| mCherry control | pupal lethality         | pupal lethality, pupation defects | rough, small eyes     | rough, small eyes     |
| E(z)107027      | no shift                | no shift                          | lethal                | positive shift        |
| ash1 36803      | no shift                | no shift                          | positive shift        | negative shift        |
| ash1 36130      | no shift                | no shift                          | positive shift        | no shift              |
